# Supplementary material for: FUTURE-GB: functional and ultrasound-guided resection of glioblastoma – a two-stage randomised control trial
Source: PubMed Central journal article supplement (PMC9668053; doi:10.1136/bmjopen-2022-064823), 2022-11-15
Supplement: bmjopen-2022-064823.reviewer_comments.pdf [file bmjopen-2022-064823.reviewer_comments.pdf]

## PEER REVIEW HISTORY

BMJ Open publishes all reviews undertaken for accepted manuscripts. Reviewers are asked to complete a checklist review form (<http://bmjopen.bmj.com/site/about/resources/checklist.pdf>) and are provided with free text boxes to elaborate on their assessment. These free text comments are reproduced below.

### ARTICLE DETAILS

|                            |                                                                                                                                                                                                                                                                                                                                                                                 |
|----------------------------|---------------------------------------------------------------------------------------------------------------------------------------------------------------------------------------------------------------------------------------------------------------------------------------------------------------------------------------------------------------------------------|
| <b>TITLE (PROVISIONAL)</b> | FUTURE-GB – Functional and Ultrasound guided Resection of Glioblastoma. A two-stage randomised control trial.                                                                                                                                                                                                                                                                   |
| <b>AUTHORS</b>             | Plaha, Puneet; Camp, Sophie; Cook, Jonathan; McCulloch, Peter; Voets, Natalie; Ma, Ruichong; Taphoorn, Martin J.B.; Dirven, Linda; Grech-Sollars, Matthew; Watts, Colin; Bulbeck, Helen; Jenkinson, Michael; Williams, Matthew; Lim, Adrian; Dixon, Luke; Price, Stephen; Ashkan, Keyoumars; Apostolopoulos, Vasileios; Barber, Vicki; Taylor, Amy; GB, FUTURE; Nandi, Dipankar |

### VERSION 1 – REVIEW

|                        |                                                          |
|------------------------|----------------------------------------------------------|
| <b>REVIEWER</b>        | Delgado-López, Pedro<br>Hospital Universitario de Burgos |
| <b>REVIEW RETURNED</b> | 07-Jul-2022                                              |

|                         |                                                                                                                                                                                                                                                                                                                                                                                                                                                                                 |
|-------------------------|---------------------------------------------------------------------------------------------------------------------------------------------------------------------------------------------------------------------------------------------------------------------------------------------------------------------------------------------------------------------------------------------------------------------------------------------------------------------------------|
| <b>GENERAL COMMENTS</b> | The proposed trial is appropriate in terms of methodology and objectives. The only concern is about the variability of iUS guidance usage in each center and its integration with neuronavigation. This variability may add some uncertainty and bias to the treatment arm, which is supposed to be mitigated with the pre-RCT study. This trial is timely and the results will eventually support (or not) the inclusion of routine iUS usage and DTI guidance in GBM surgery. |
|-------------------------|---------------------------------------------------------------------------------------------------------------------------------------------------------------------------------------------------------------------------------------------------------------------------------------------------------------------------------------------------------------------------------------------------------------------------------------------------------------------------------|

|                        |                                                           |
|------------------------|-----------------------------------------------------------|
| <b>REVIEWER</b>        | Peereboom , David<br>Cleveland Clinic, Brain Tumor Center |
| <b>REVIEW RETURNED</b> | 25-Jul-2022                                               |

|                         |                                                                                                                                                                                                |
|-------------------------|------------------------------------------------------------------------------------------------------------------------------------------------------------------------------------------------|
| <b>GENERAL COMMENTS</b> | You might consider as a secondary endpoint, the amount of residual tumor after resection as some feel this to be better than extent of resection as an indicator of risk of early progression. |
|-------------------------|------------------------------------------------------------------------------------------------------------------------------------------------------------------------------------------------|

### VERSION 1 – AUTHOR RESPONSE

Reviewer 1:

Many thanks for your kind comments. We agree there is a certain degree of variability in iUS utility in different centres. As you state, the aim of Stage 1 is to try to standardise this usage. We also feel, that a certain degree of variability in the RCT will also reflect real world usage of iUS.

Reviewer 2:

Many thanks for your insightful comment. We agree with your comment and the amount of residual is already being collected. We will also add it as a secondary outcome.

Many thanks again and we look forward to hearing from you soon.

Yours Faithfully,

Professor Puneet Plaha
