# Supplementary material for: FUTURE-GB: functional and ultrasound-guided resection of glioblastoma – a two-stage randomised control trial
Source: PubMed Central journal article supplement (PMC9668053; doi:10.1136/bmjopen-2022-064823), 2022-11-15
Supplement: bmjopen-2022-064823supp001.pdf [file bmjopen-2022-064823supp001.pdf]

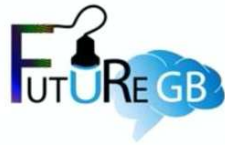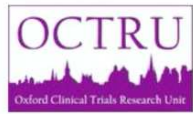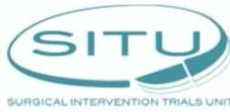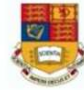

Imperial College  
London

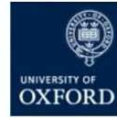

## FUTURE-GB STAGE 1 SITE DATA COMPLETION ASSESSMENT

**Reviewers:** *Intra operative workflow & DTI:* Prof Natalie Voets, Puneet Plaha, Miss Joy Roach, Amy Taylor  
*Intra operative workflow & US:* Dipankar Nandi, Sophie Camp, Luke Dixon, Amy Taylor  
*REDCap data entry & workflow:* Amy Taylor, Jack Morris, Puneet Plaha

| Site name:                                                                  | Total Patients recruited: |             | Total Patients screened: |             |             |
|-----------------------------------------------------------------------------|---------------------------|-------------|--------------------------|-------------|-------------|
| <b>Study ID</b>                                                             |                           |             |                          |             |             |
| <b>Date of review</b>                                                       |                           |             |                          |             |             |
| <b>Date of surgery</b>                                                      |                           |             |                          |             |             |
| <b>Awake or GA surgery</b>                                                  |                           |             |                          |             |             |
| <b>Pre -op tumour planning on MRI scans</b>                                 |                           |             |                          |             |             |
| <b>Pre-op tumour volume (cm<sup>3</sup>)</b>                                |                           |             |                          |             |             |
| <b>Post-op tumour volume (cm<sup>3</sup>)</b>                               |                           |             |                          |             |             |
| <b>Comments:</b>                                                            |                           |             |                          |             |             |
| <b>MRI DTI and USG Acquisition</b>                                          |                           |             |                          |             |             |
| DTI – Site engaged with trials unit regarding DTI acquisition protocols ?   | Yes/No                    | Yes/No      | Yes/No                   | Yes/No      | Yes/No      |
| DTI scan acquired for surgery?                                              | Yes/No                    | Yes/No      | Yes/No                   | Yes/No      | Yes/No      |
| DTI Tracts reconstructed ?                                                  | Yes/No                    | Yes/No      | Yes/No                   | Yes/No      | Yes/No      |
| USG used during surgery?                                                    | Yes/No                    | Yes/No      | Yes/No                   | Yes/No      | Yes/No      |
| <b>Redcap data entry complete?</b>                                          | Yes/No                    | Yes/No      | Yes/No                   | Yes/No      | Yes/No      |
| Any difficulty entering data on REDCap ?                                    | Yes/No                    | Yes/No      | Yes/No                   | Yes/No      | Yes/No      |
| <b>Intraoperative workflow &amp; Quentry imaging data transfer complete</b> | Yes/No                    | Yes/No      | Yes/No                   | Yes/No      | Yes/No      |
| Data anonymised                                                             | Yes/No                    | Yes/No      | Yes/No                   | Yes/No      | Yes/No      |
| Pre-op MRI scan performed                                                   | Yes/No                    | Yes/No      | Yes/No                   | Yes/No      | Yes/No      |
| Pre -op MRI scan transferred                                                |                           |             |                          |             |             |
| Any Intra-op Screenshots acquired for awake surgery                         | Yes/No/ N/A               | Yes/No/ N/A | Yes/No/ N/A              | Yes/No/ N/A | Yes/No/ N/A |
| Intra-op Screenshots acquired for GA neurophysiology                        | Yes/No/ N/A               | Yes/No/ N/A | Yes/No/ N/A              | Yes/No/ N/A | Yes/No/ N/A |
| USG pre-resection – pictures/videos                                         | Yes/No                    | Yes/No      | Yes/No                   | Yes/No      | Yes/No      |
| USG post-resection- pictures/videos                                         | Yes/No                    | Yes/No      | Yes/No                   | Yes/No      | Yes/No      |
| Post-op MRI scan performed                                                  | Yes/No                    | Yes/No      | Yes/No                   | Yes/No      | Yes/No      |

FUTURE-GB\_S1\_Template\_SiteDataCompletion\_V3.0\_18Oct2021.docx

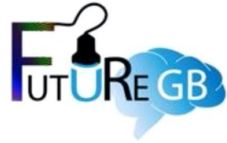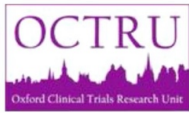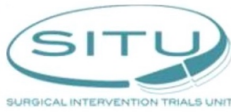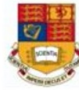

Imperial College  
London

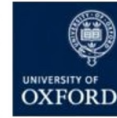

### FUTURE-GB STAGE 1 SITE DATA COMPLETION ASSESSMENT

|                                                                                                                                                                                                                                                                                |        |        |        |        |        |
|--------------------------------------------------------------------------------------------------------------------------------------------------------------------------------------------------------------------------------------------------------------------------------|--------|--------|--------|--------|--------|
| <b>Post op MRI scan transferred</b>                                                                                                                                                                                                                                            | Yes/No | Yes/No | Yes/No | Yes/No | Yes/No |
| <b>Difficulties in transferring Data to Quentry</b>                                                                                                                                                                                                                            | Yes/No | Yes/No | Yes/No | Yes/No | Yes/No |
| <b>Site PI - DTI comments</b>                                                                                                                                                                                                                                                  |        |        |        |        |        |
| <b>Reviewer - DTI comments</b>                                                                                                                                                                                                                                                 |        |        |        |        |        |
| <b>Reviewer - US comments</b>                                                                                                                                                                                                                                                  |        |        |        |        |        |
| <b>Site PI - US comments</b>                                                                                                                                                                                                                                                   |        |        |        |        |        |
| <b>Primary outcomes for Stage 1 complete</b>                                                                                                                                                                                                                                   | Yes/No | Yes/No | Yes/No | Yes/No | Yes/No |
| Operation length                                                                                                                                                                                                                                                               |        |        |        |        |        |
| Successful use of DTI neuronavigation and iUS to achieve complete tumour resection without major neurological deficit<br><i>(success defined here as appropriate and competent use of the imaging technologies to achieve the projected surgical outcome for each patient)</i> |        |        |        |        |        |
| Extent of tumour resection assessed on postoperative MRI scan                                                                                                                                                                                                                  |        |        |        |        |        |
| Surgical Complication and Serious Adverse Events (if applicable)                                                                                                                                                                                                               | Yes/No | Yes/No | Yes/No | Yes/No | Yes/No |
| <b>Reviewer Comments:</b>                                                                                                                                                                                                                                                      |        |        |        |        |        |
| <b>Analysis of imaging data to answer tertiary end point of the RCT study</b>                                                                                                                                                                                                  |        |        |        |        |        |
| Utility of imaging data to answer the DTI tertiary endpoint                                                                                                                                                                                                                    |        |        |        |        |        |
| Utility of imaging data to answer the US tertiary endpoint                                                                                                                                                                                                                     |        |        |        |        |        |
| <b>Reviewer Comments</b>                                                                                                                                                                                                                                                       |        |        |        |        |        |

|                                  |
|----------------------------------|
| <b>Overall reviewer comments</b> |
|----------------------------------|

### SITE FEEDBACK LOG

| Date of meeting/discussion with site during Stage 1 | Type of meeting | Feedback comments |
|-----------------------------------------------------|-----------------|-------------------|
|                                                     |                 |                   |
|                                                     |                 |                   |
|                                                     |                 |                   |
|                                                     |                 |                   |
|                                                     |                 |                   |

FUTURE-GB\_S1\_Template\_SiteDataCompletion\_V3.0\_18Oct2021.docx
