# Supplementary material for: FUTURE-GB: functional and ultrasound-guided resection of glioblastoma – a two-stage randomised control trial
Source: PubMed Central journal article supplement (PMC9668053; doi:10.1136/bmjopen-2022-064823), 2022-11-15
Supplement: bmjopen-2022-064823supp002.pdf [file bmjopen-2022-064823supp002.pdf]

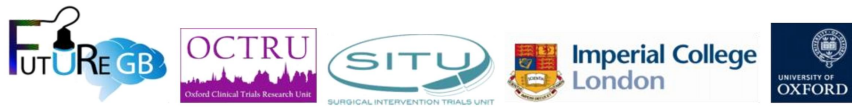

### FUTURE-GB STAGE 2 PROGRESSION AGREEMENT

The Co-Chief investigators of the FUTURE-GB trial agree that the trial site:

<site name and NHS Trust>

has met the following provisions in Stage 1 of the FUTURE-GB trial and recruited <number> participants

Trial team review was conducted on DDMonYYYY and it was agreed on this date (DDMonYYYY) that this site can proceed to Stage 2.

Co-Chief investigators report:

This should include:

1. Objective endpoints of Stage 1
2. Quality of DT and US imaging data
3. Any difficulties regarding data-workflow from site
4. Any suggestions for improvement

*Note: Completion of this agreement by all signatories will result in the Stage 1 Registration System and screening system being closed by the Trial Manager on or after this date, and requesting that the site is opened to recruitment in the Stage 2 Screening, Randomisation and Database System. The Stage 1 Database system will not be closed to the site until all outstanding data has been entered and cleaned/queried as required by the Trial Statistician.*

|                      |                                                 |                           |
|----------------------|-------------------------------------------------|---------------------------|
| Document title       | FUTURE-GB_Stage2Progression_V1.0_11Jan2020.docx | Page 1 of 2               |
| Chief Investigators: | Puneet Plaha, Sophie Camp, Dipankar Nandi       | IRAS No. 264482 REC ref.: |

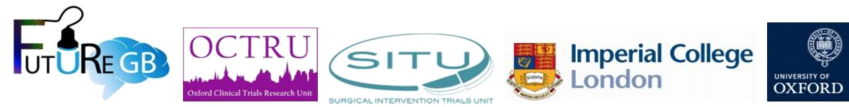

### FUTURE-GB STAGE 2 PROGRESSION AGREEMENT

| Name                     | Signature | Date |
|--------------------------|-----------|------|
| Professor Puneet Plaha   |           |      |
| Professor Dipankar Nandi |           |      |
| Miss Sophie Camp         |           |      |

|                      |                                                 |                           |
|----------------------|-------------------------------------------------|---------------------------|
| Document title       | FUTURE-GB_Stage2Progression_V1.0_11Jan2020.docx | Page 2 of 2               |
| Chief Investigators: | Puneet Plaha, Sophie Camp, Dipankar Nandi       | IRAS No. 264482 REC ref.: |
