# Supplementary material for: FUTURE-GB: functional and ultrasound-guided resection of glioblastoma – a two-stage randomised control trial
Source: PubMed Central journal article supplement (PMC9668053; doi:10.1136/bmjopen-2022-064823), 2022-11-15
Supplement: bmjopen-2022-064823supp004.pdf [file bmjopen-2022-064823supp004.pdf]

PARTICIPANT ID: FG-XX-XXXX

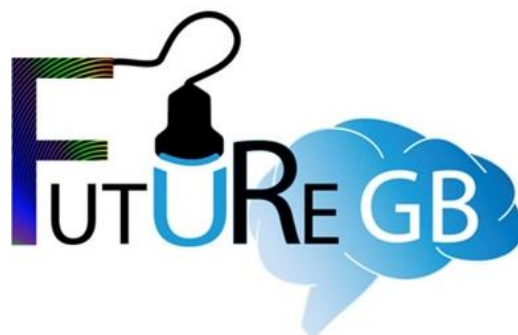

## SITE ADMINISTERED QUESTIONNAIRE

Please tick which time point this questionnaire relates to:

|                    |                          |           |                          |
|--------------------|--------------------------|-----------|--------------------------|
| Baseline           | <input type="checkbox"/> | 12 months | <input type="checkbox"/> |
| Hospital Discharge | <input type="checkbox"/> | 15 months | <input type="checkbox"/> |
| 6 weeks            | <input type="checkbox"/> | 18 months | <input type="checkbox"/> |
| 3 months           | <input type="checkbox"/> | 21 months | <input type="checkbox"/> |
| 6 months           | <input type="checkbox"/> | 24 months | <input type="checkbox"/> |
| 9 months           | <input type="checkbox"/> |           |                          |

Date of completion: DD/MM/YYYY

Completed by: (PRINT NAME).....

This document contains the following validated questionnaires:

- Barthel Index
- MOCA Assessment
- MRC Muscle Power Scale
- WHO Performance Status

PARTICIPANT ID: FG-XX-XXXX

**BARTHEL INDEX**

| Activity                                                                                                                                                                                                                                                                      | Score |
|-------------------------------------------------------------------------------------------------------------------------------------------------------------------------------------------------------------------------------------------------------------------------------|-------|
| <b>FEEDING</b><br>0 = unable<br>5 = needs help cutting, spreading butter, etc., or requires modified diet<br>10 = independent                                                                                                                                                 | _____ |
| <b>BATHING</b><br>0 = dependent<br>5 = independent (or in shower)                                                                                                                                                                                                             | _____ |
| <b>GROOMING</b><br>0 = needs to help with personal care<br>5 = independent face/hair/teeth/shaving (implements provided)                                                                                                                                                      | _____ |
| <b>DRESSING</b><br>0 = dependent<br>5 = needs help but can do about half unaided<br>10 = independent (including buttons, zips, laces, etc.)                                                                                                                                   | _____ |
| <b>BOWELS</b><br>0 = incontinent (or needs to be given enemas)<br>5 = occasional accident<br>10 = continent                                                                                                                                                                   | _____ |
| <b>BLADDER</b><br>0 = incontinent, or catheterized and unable to manage alone<br>5 = occasional accident<br>10 = continent                                                                                                                                                    | _____ |
| <b>TOILET USE</b><br>0 = dependent<br>5 = needs some help, but can do something alone<br>10 = independent (on and off, dressing, wiping)                                                                                                                                      | _____ |
| <b>TRANSFERS (BED TO CHAIR AND BACK)</b><br>0 = unable, no sitting balance<br>5 = major help (one or two people, physical), can sit<br>10 = minor help (verbal or physical)<br>15 = independent                                                                               | _____ |
| <b>MOBILITY (ON LEVEL SURFACES)</b><br>0 = immobile or < 50 yards<br>5 = wheelchair independent, including corners, > 50 yards<br>10 = walks with help of one person (verbal or physical) > 50 yards<br>15 = independent (but may use any aid; for example, stick) > 50 yards | _____ |
| <b>STAIRS</b><br>0 = unable<br>5 = needs help (verbal, physical, carrying aid)<br>10 = independent                                                                                                                                                                            | _____ |
| <b>TOTAL (0-100):</b>                                                                                                                                                                                                                                                         | _____ |

PARTICIPANT ID: FG-XX-XXXX

**MOCA ASSESSMENT**

|                                                                                   |                                                                                                                                                                        |                                                                                                                              |        |        |        |       |                                                                                                                              |                                                   |               |       |
|-----------------------------------------------------------------------------------|------------------------------------------------------------------------------------------------------------------------------------------------------------------------|------------------------------------------------------------------------------------------------------------------------------|--------|--------|--------|-------|------------------------------------------------------------------------------------------------------------------------------|---------------------------------------------------|---------------|-------|
| <b>VISUOSPATIAL / EXECUTIVE</b>                                                   |                                                                                                                                                                        |                                             |        |        |        |       | Copy<br>cube                                                                                                                 | Draw <b>CLOCK</b> (Ten past eleven)<br>(3 points) | <b>POINTS</b> |       |
|  |                                                                                                                                                                        | <input type="checkbox"/> <input type="checkbox"/> <input type="checkbox"/> <input type="checkbox"/> <input type="checkbox"/> |        |        |        |       | <input type="checkbox"/> <input type="checkbox"/> <input type="checkbox"/> <input type="checkbox"/> <input type="checkbox"/> |                                                   |               | ___/5 |
| <b>NAMING</b>                                                                     |                                                                                                                                                                        |                                           |        |        |        |       | <input type="checkbox"/> <input type="checkbox"/> <input type="checkbox"/>                                                   |                                                   |               | ___/3 |
| <b>MEMORY</b>                                                                     | Read list of words, subject must repeat them. Do 2 trials. Do a recall after 5 minutes.                                                                                |                                                                                                                              | FACE   | VELVET | CHURCH | DAISY | RED                                                                                                                          | No points                                         |               |       |
|                                                                                   |                                                                                                                                                                        | 1st trial                                                                                                                    |        |        |        |       |                                                                                                                              |                                                   |               |       |
|                                                                                   |                                                                                                                                                                        | 2nd trial                                                                                                                    |        |        |        |       |                                                                                                                              |                                                   |               |       |
| <b>ATTENTION</b>                                                                  | Read list of digits (1 digit/ sec). Subject has to repeat them in the forward order [ ] 2 1 8 5 4<br>Subject has to repeat them in the backward order [ ] 7 4 2        |                                                                                                                              |        |        |        |       | ___/2                                                                                                                        |                                                   |               |       |
|                                                                                   | Read list of letters. The subject must tap with his hand at each letter A. No points if ≥ 2 errors<br>[ ] FBACMNAAJKLBAFAKDEAAAJAMOFAB                                 |                                                                                                                              |        |        |        |       | ___/1                                                                                                                        |                                                   |               |       |
|                                                                                   | Serial 7 subtraction starting at 100 [ ] 93 [ ] 86 [ ] 79 [ ] 72 [ ] 65<br>4 or 5 correct subtractions: 3 pts, 2 or 3 correct: 2 pts, 1 correct: 1 pt, 0 correct: 0 pt |                                                                                                                              |        |        |        |       | ___/3                                                                                                                        |                                                   |               |       |
| <b>LANGUAGE</b>                                                                   | Repeat : I only know that John is the one to help today. [ ]<br>The cat always hid under the couch when dogs were in the room. [ ]                                     |                                                                                                                              |        |        |        |       | ___/2                                                                                                                        |                                                   |               |       |
|                                                                                   | Fluency / Name maximum number of words in one minute that begin with the letter F [ ] ____ (N ≥ 11 words)                                                              |                                                                                                                              |        |        |        |       | ___/1                                                                                                                        |                                                   |               |       |
| <b>ABSTRACTION</b>                                                                | Similarity between e.g. banana - orange = fruit [ ] train - bicycle [ ] watch - ruler                                                                                  |                                                                                                                              |        |        |        |       | ___/2                                                                                                                        |                                                   |               |       |
| <b>DELAYED RECALL</b>                                                             | Has to recall words WITH NO CUE                                                                                                                                        | FACE                                                                                                                         | VELVET | CHURCH | DAISY  | RED   | Points for UNCUED recall only                                                                                                |                                                   |               |       |
|                                                                                   |                                                                                                                                                                        | [ ]                                                                                                                          | [ ]    | [ ]    | [ ]    | [ ]   |                                                                                                                              |                                                   |               |       |
| <b>Optional</b>                                                                   | Category cue<br>Multiple choice cue                                                                                                                                    |                                                                                                                              |        |        |        |       |                                                                                                                              |                                                   |               |       |
| <b>ORIENTATION</b>                                                                | [ ] Date [ ] Month [ ] Year [ ] Day [ ] Place [ ] City                                                                                                                 |                                                                                                                              |        |        |        |       | ___/6                                                                                                                        |                                                   |               |       |
| © Z.Nasreddine MD Version November 7, 2004<br>www.mocatest.org                    |                                                                                                                                                                        | Normal ≥ 26 / 30                                                                                                             |        |        |        |       | <b>TOTAL</b> ___/30<br>Add 1 point if ≤ 12 yr edu                                                                            |                                                   |               |       |

PARTICIPANT ID: FG-XX-XXXX

**MRC MUSCLE POWER SCALE**

| Score | Description                                    |
|-------|------------------------------------------------|
| 0     | No contraction                                 |
| 1     | Flicker or trace of contraction                |
| 2     | Active movement, with gravity eliminated       |
| 3     | Active movement against gravity                |
| 4     | Active movement against gravity and resistance |
| 5     | Normal power                                   |

Please grade the 4 limbs of the patient

Left arm: Right arm: Left leg: Right leg: **WHO PERFORMANCE STATUS**

The WHO performance status classification categorises patients as:

- 0: able to carry out all normal activity without restriction
- 1: restricted in strenuous activity but ambulatory and able to carry out light work
- 2: ambulatory and capable of all self-care but unable to carry out any work activities; up and about more than 50% of waking hours
- 3: symptomatic and in a chair or in bed for greater than 50% of the day but not bedridden
- 4: completely disabled; cannot carry out any self-care; totally confined to bed or chair.

Please circle the WHO Performance status for the patient as at today:

0                      1                      2                      3                      4
