# Supplementary material for: FUTURE-GB: functional and ultrasound-guided resection of glioblastoma – a two-stage randomised control trial
Source: PubMed Central journal article supplement (PMC9668053; doi:10.1136/bmjopen-2022-064823), 2022-11-15
Supplement: bmjopen-2022-064823supp013.pdf [file bmjopen-2022-064823supp013.pdf]

University of  
Oxford Logo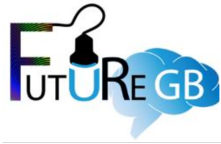

## PROXY CONSENT FORM

Imperial Logo

If you agree,  
please check  
box

|                                                                                                                                                                                                                                                                                                      |  |
|------------------------------------------------------------------------------------------------------------------------------------------------------------------------------------------------------------------------------------------------------------------------------------------------------|--|
| 1. I confirm that I have read and understood the Proxy Information Leaflet dated <u>DDMon20YY</u> version <u>XX</u> . I have had the opportunity to consider the information, ask questions and have had these answered satisfactorily.                                                              |  |
| 2. I understand that my participation is voluntary and that I am free to withdraw at any time without giving any reason, and without my relative/friend's medical care or legal rights being affected.                                                                                               |  |
| 3. I consent to the research team holding my contact details so that they can contact me about the study. I understand these details will be held securely and destroyed at the 12 months after the end of the study.                                                                                |  |
| 4. I understand that as long as I feel able to I will complete regular questionnaires about the abilities and quality of life of the person I have been nominated to be the Proxy of. I understand if the person who nominated me withdraws or loses capacity – this will also end my participation. |  |
| 5. I agree to take part in the FUTURE-GB study as a Proxy Representative.                                                                                                                                                                                                                            |  |

|                                                                                   |                                                                                                                                                                                                                                                                                                                              |
|-----------------------------------------------------------------------------------|------------------------------------------------------------------------------------------------------------------------------------------------------------------------------------------------------------------------------------------------------------------------------------------------------------------------------|
| Name of Participant: _____                                                        |                                                                                                                                                                                                                                                                                                                              |
| Relationship to the participant:                                                  | Partner <input type="checkbox"/> Family member <input type="checkbox"/> Carer <input type="checkbox"/> Friend <input type="checkbox"/><br>Other (please specify) _____                                                                                                                                                       |
| Approximately how much time do you spend with the FUTURE-GB participant per week? | <input type="checkbox"/> I am in contact with them daily<br><input type="checkbox"/> I am in contact with them every few days<br><input type="checkbox"/> I am in contact with them weekly<br><input type="checkbox"/> I am in contact with them every 2 weeks<br><input type="checkbox"/> I am in contact with them monthly |
| Name of Proxy Representative                                                      | Signature: _____ Date: _____                                                                                                                                                                                                                                                                                                 |
| Name of Person Taking Consent                                                     | Signature: _____ Date: _____                                                                                                                                                                                                                                                                                                 |

Deleted: FUTUREGB\_ProxyICF\_V3.0\_10Jun2021\_clean.docx

FUTUREGB\_ProxyICF\_V3.0\_10Jun2021.docx

IRAS ID: 264482

Co- Investigator: Prof Puneet Plaha, Ms Sophie Camp and Prof Dipankar Nandi.
